# Supplementary material for: Complete androgen insensitivity syndrome caused by a deep intronic pseudoexon-activating mutation in the androgen receptor gene
Source: PubMed Central journal article supplement (PMC5016895; doi:10.1038/srep32819), 2016-09-09
Supplement: srep32819-s1.pdf [file srep32819-s1.pdf]

## Supplementary information

### **Complete androgen insensitivity syndrome caused by a deep intronic pseudoexon-activating mutation in the androgen receptor gene**

Johanna Känsäkoski<sup>1,2</sup>, Jarmo Jääskeläinen<sup>3</sup>, Tiina Jääskeläinen<sup>4</sup>, Johanna Tommiska<sup>1,2</sup>, Lilli Saarinen<sup>5</sup>, Rainer Lehtonen<sup>5</sup>, Sampsa Hautaniemi<sup>5</sup>, Mikko J. Frilander<sup>6</sup>, Jorma J. Palvimo<sup>7</sup>, Jorma Toppari<sup>8†</sup>, Taneli Raivio<sup>1,2†</sup>

<sup>1</sup> Physiology, Faculty of Medicine, University of Helsinki, Helsinki, Finland

<sup>2</sup> Children's Hospital, Helsinki University Hospital, Helsinki, Finland

<sup>3</sup> Department of Pediatrics, University of Eastern Finland and Kuopio University Hospital, Kuopio, Finland

<sup>4</sup> Institute of Dentistry and Institute of Biomedicine, University of Eastern Finland, Kuopio, Finland.

<sup>5</sup> Research Programs Unit, Genome-Scale Biology, Faculty of Medicine, University of Helsinki, Helsinki, Finland

<sup>6</sup> Institute of Biotechnology, University of Helsinki, Helsinki, Finland

<sup>7</sup> Institute of Biomedicine, University of Eastern Finland, Kuopio, Finland

<sup>8</sup> Departments of Physiology and Pediatrics, University of Turku and Turku University Hospital, Finland

†Equal contribution

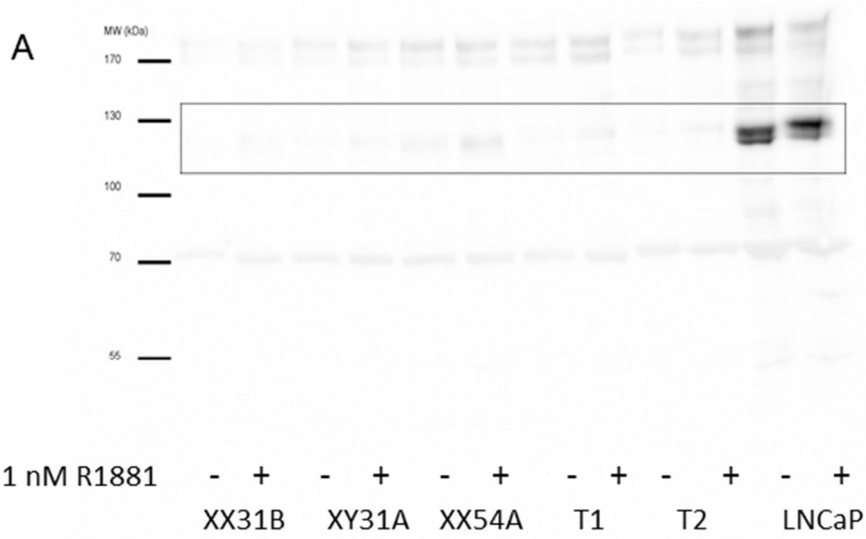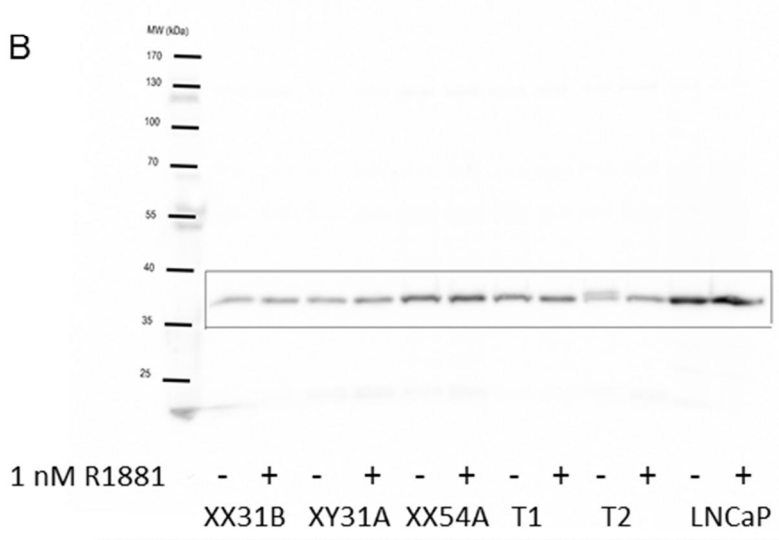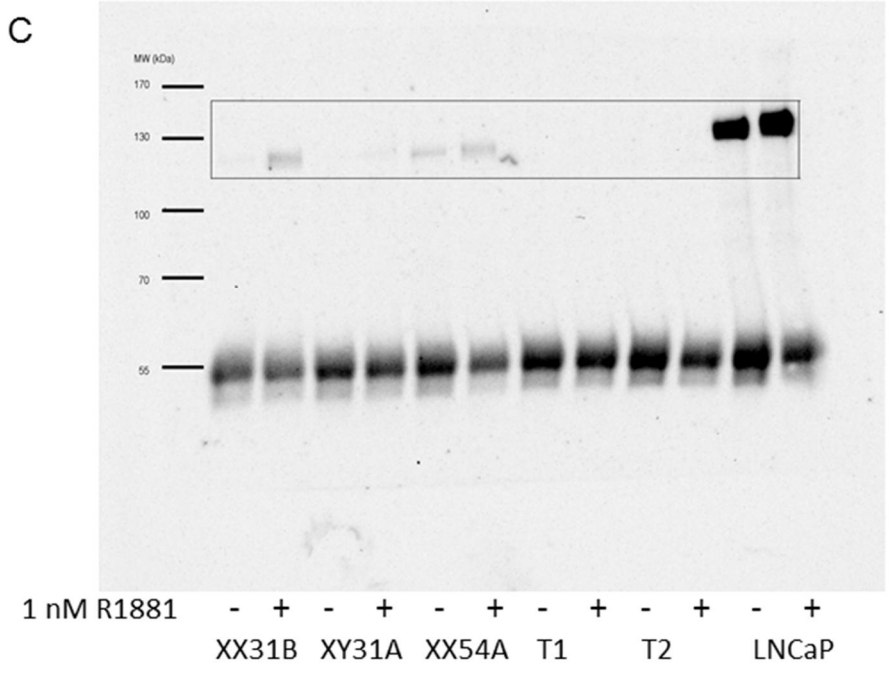

**Supplementary Figure S1. Full-length blots of AR protein expression analysis.** Areas of the blots that are presented in Fig. 2 are marked with a box. A) Input samples for AR immunoprecipitation detected with mouse

monoclonal  $\alpha$ -AR antibody. B) Input samples for AR immunoprecipitation detected with  $\alpha$ -GAPDH antibody to control the loading of input samples. C) Immunoprecipitated samples detected with mouse monoclonal  $\alpha$ -AR antibody.
